# Supplementary material for: Roles of plant growth regulators on yield, grain qualities and antioxidant enzyme activities in super hybrid rice (Oryza sativa L.)
Source: PubMed Central journal article supplement (PMC4883720; doi:10.1186/1939-8433-6-9), 2013-04-16

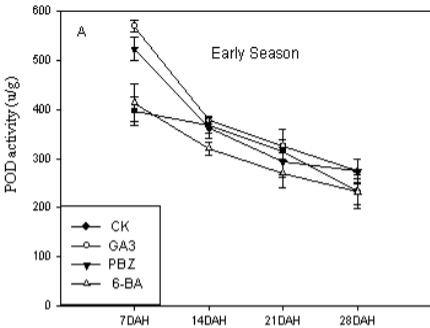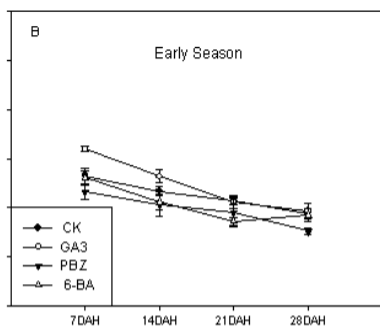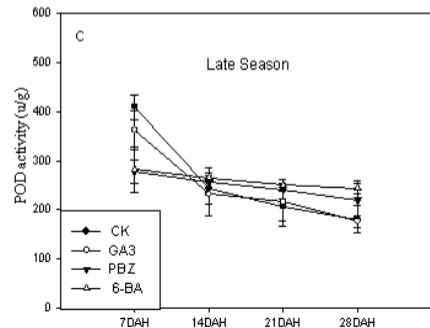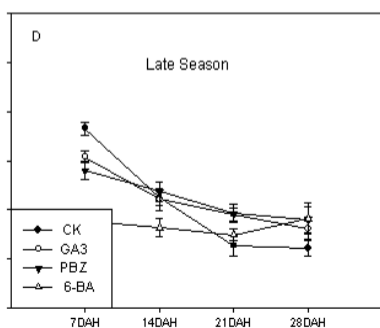

Supplement: 12284_2012_47_MOESM2_ESM.pdf [file 12284_2012_47_MOESM2_ESM.pdf]
